# Supplementary material
Source: HighWire-hosted journal article supplement (https://bmjopen.bmj.com/content/11/9/e047856)
Supplement: inline-supplementary-material-1 [file inline-supplementary-material-1.pdf]

## Supplemental Data

### Search Terms

The same search string was entered into each database. The Search terms for Embase for example were as follows:

Teaching OR learning OR instruction OR Education OR Training OR e-learning OR Platform

AND

LGBTQ inclusive OR Lesbian OR Gay OR Bisexual OR Transgender OR Queer

AND

Sex\* OR Sexual Health OR Intimacy
